# Supplementary material
Source: publisher figshare collection journal article supplement (https://diabetesjournals.figshare.com/articles/dataset/_/19209897)
Supplement: Supplementary file 1 [file 1]

## **Supplementary Appendix**

### **Association of Longitudinal Trajectories of Insulin Resistance with Adverse Renal Outcomes**

**Supplementary Materials**

**Supplementary Tables**

**Supplementary Figure Legends**

**Supplementary References**

## **Supplementary Materials**

### **Study population**

KoGES is a prospective cohort study in which participants from the general population aged 40–69 years residing in a rural area of South Korea were enrolled from 2001 to 2002. The participants were followed every 2 years with the seventh check-up in 2014. The participants underwent anthropometric examination, laboratory tests, and completed questionnaires on lifestyle and medical history at every check-up. The aim of KoGES study is to track public health trends and to provide novel insights into preventive health care issues in South Korea by the Korean government.

### **Data collection**

The anthropometric examinations were conducted by trained nurses following the standard protocols. All blood samples were obtained after 8h fasting and analyzed by Seoul Clinical Laboratories (Seoul, Republic of Korea) within 24h of sampling. Serum creatinine, blood urea nitrogen, glucose, insulin, alanine transaminase, aspartate transaminase, HbA1c, total cholesterol, triglyceride, high-density lipoprotein cholesterol, and high sensitivity C-reactive protein were analyzed. Urine samples were obtained after the first void, and a urine test was conducted with a calibrated urine reagent strip (URiSCAN Pro II; YD Diagnostics Corp., Seoul, Korea). Throughout the study period, two types of chemistry analyzers were used (ADVIA 1650, Siemens, Tarrytown, NY from September 2002 to December 2010; ADVIA 1800, Siemens, Tarrytown, NY after January 2011). To minimize the measurement variability between the analyzers, adequate equations per the manufacturers were applied to convert the values measured by ADVIA 1800 to that from ADVIA 1650 for serum glucose, total cholesterol, high-density lipoprotein cholesterol, triglyceride, alanine transaminase, aspartate transaminase, blood urea nitrogen, and creatinine.

## **Latent class analysis for classification of the participants by time-serial insulin resistance trajectory**

The fitness of the model was estimated using the following three prespecified criteria. First, the Bayesian information criterion (BIC) was used to estimate the model performance. Second, the average probability of the final group membership across the trajectory groups should be over 90%. Third, at least 5% of all participants should be included in each group (1). We constructed models ranging from two to five trajectories and assessed the fitness of each model. Although BIC tends to decrease with an increasing number of trajectories, the average probability of the final group membership across the trajectory groups declined to less than 90% (**Supplementary Table S1**). Therefore, two homeostatic model assessment for insulin resistance (HOMA-IR) trajectories were identified to meet all three prespecified criteria. Consequently, the time-serial trajectories of HOMA-IR were defined as either stable or increasing.

As a sensitivity analysis for the differential association of the identified HOMA-IR trajectories with renal outcomes, three and four trajectories were used, and their association with outcomes was analyzed; however, they did not meet all three prespecified criteria of model fitness.

## **Statistical analyses**

Continuous variables are shown as mean±standard deviation, and categorical variables as numbers (percentages). For comparison between groups, the Student's t-test or analysis of variance was used for continuous variables, and the chi-square test was used for categorical variables. For the survival analysis, Kaplan-Meier censoring estimates were used to calculate the cumulative event rates, and the log-rank test was used to compare the survival curves

between groups. The Cox proportional hazard model was used to estimate the hazard ratio (HR) and 95% confidence interval (CI), and the model assumption was assessed using Schoenfeld residuals. In the sensitivity analysis of patients with estimated glomerular filtration rate (eGFR)  $\geq 90$  mL/min/1.73m<sup>2</sup> at baseline and fourth check-ups, covariates were individually adjusted to avoid overfitting due to the small number of adverse renal outcomes in this population. For the sensitivity analysis to minimize the confounding effect of diabetes mellitus at baseline, subgroup analysis in subjects with or without diabetes mellitus at baseline was performed. In each subpopulation, the association of the HOMA-IR trajectory with adverse renal outcomes was evaluated. To account for newly developed diabetes during the exposure period, the outcome analysis was performed in subjects with diabetes mellitus at the end of the exposure period (fourth check-up). The outcomes by HOMA-IR trajectory were also investigated in each subgroup according to the clinical characteristics such as age  $\geq 60$  years, sex, body mass index  $\geq 25$  kg/m<sup>2</sup>, the presence of hypertension and dyslipidemia at baseline check-up, baseline HOMA-IR  $\geq 2.01$  (75<sup>th</sup> percentile), and baseline eGFR  $< 90$  mL/min/1.73m<sup>2</sup>. To eliminate the potential bias by baseline HOMA-IR levels, 1:1 matching by baseline HOMA-IR between the HOMA-IR trajectory groups was performed using propensity score matching using a logistic regression model with the nearest-neighbor method without replacement and a caliper of 0.01 of the score.

## Supplementary Table

**Supplementary Table S1. Estimation process for the most optimal number of HOMA-IR trajectories.**

| Number of groups | BIC   | Average probability of group membership | Proportion of groups (%) |         |         |         |         |
|------------------|-------|-----------------------------------------|--------------------------|---------|---------|---------|---------|
|                  |       |                                         | Group 1                  | Group 2 | Group 3 | Group 4 | Group 5 |
| 2                | 45802 | 95.1%                                   | 89.2                     | 10.8    |         |         |         |
| 3                | 45327 | 85.6%                                   | 79.1                     | 14.1    | 6.8     |         |         |
| 4                | 45310 | 70.1%                                   | 59.8                     | 24.0    | 8.5     | 7.7     |         |
| 5                | 45286 | 56.4%                                   | 41.5                     | 29.2    | 15.6    | 7.1     | 6.7     |

BIC, Bayesian information criterion; HOMA-IR, homeostatic model assessment of insulin resistance.

**Supplementary Table S2. Multivariate analyses for the association between increasing HOMA-IR trajectory and adverse renal outcomes using various definitions of dyslipidemia.**

| Model 2 with other definitions of dyslipidemia                                                                                                                  | HR (95%CI)         | P-value |
|-----------------------------------------------------------------------------------------------------------------------------------------------------------------|--------------------|---------|
| Age + sex + baseline eGFR + BMI $\geq 25 \text{ kg/m}^2$ + diabetes mellitus + hypertension + various definitions of dyslipidemia as below:                     |                    |         |
| Total cholesterol $\geq 200 \text{ mg/dL}$ or treatment with any lipid-lowering medications (n=2010)                                                            | 1.58 (1.22 – 2.05) | <0.001  |
| Total cholesterol $\geq 240 \text{ mg/dL}$ or treatment with any lipid-lowering medications (n=555)                                                             | 1.58 (1.22 – 2.05) | <0.001  |
| Triglyceride $\geq 150 \text{ mg/dL}$ or treatment with any lipid-lowering medications (n=2220)                                                                 | 1.53 (1.18 – 1.99) | 0.001   |
| Triglyceride $\geq 200 \text{ mg/dL}$ or treatment with any lipid-lowering medications (n=1245)                                                                 | 1.56 (1.20 – 2.03) | <0.001  |
| LDL-C $\geq 100 \text{ mg/dL}$ or treatment with any lipid-lowering medications (n=3567)                                                                        | 1.57 (1.21 – 2.04) | <0.001  |
| LDL-C $\geq 130 \text{ mg/dL}$ or treatment with any lipid-lowering medications (n=1622)                                                                        | 1.58 (1.22 – 2.05) | <0.001  |
| LDL-C $\geq 160 \text{ mg/dL}$ or treatment with any lipid-lowering medications (n=538)                                                                         | 1.58 (1.22 – 2.05) | <0.001  |
| HDL-C $< 40 \text{ mg/dL}$ or treatment with any lipid-lowering medications (n=1816)                                                                            | 1.58 (1.22 – 2.05) | <0.001  |
| Triglyceride $\geq 150 \text{ mg/dL}$ or HDL-C $< 40 \text{ mg/dL}$ or treatment with any lipid-lowering medications (n=2859)                                   | 1.56 (1.20 – 2.02) | <0.001  |
| Triglyceride $\geq 200 \text{ mg/dL}$ or HDL-C $< 40 \text{ mg/dL}$ or treatment with any lipid-lowering medications (n=2277)                                   | 1.56 (1.20 – 2.03) | <0.001  |
| Triglyceride $\geq 150 \text{ mg/dL}$ or LDL-C $\geq 100 \text{ mg/dL}$ or treatment with any lipid-lowering medications (n=4363)                               | 1.58 (1.22 – 2.05) | <0.001  |
| Triglyceride $\geq 200 \text{ mg/dL}$ or LDL-C $\geq 160 \text{ mg/dL}$ or treatment with any lipid-lowering medications (n=1569)                               | 1.57 (1.21 – 2.04) | <0.001  |
| Triglyceride $\geq 150 \text{ mg/dL}$ or HDL-C $< 40 \text{ mg/dL}$ or LDL-C $\geq 100 \text{ mg/dL}$ or treatment with any lipid-lowering medications (n=4603) | 1.58 (1.21 – 2.05) | <0.001  |
| Triglyceride $\geq 200 \text{ mg/dL}$ or HDL-C $< 40 \text{ mg/dL}$ or LDL-C $\geq 160 \text{ mg/dL}$ or treatment with any lipid-lowering medications (n=2560) | 1.57 (1.21 – 2.04) | <0.001  |

HR (95% CI) for adverse renal outcomes of increasing HOMA-IR trajectory compared to stable HOMA-IR trajectory is presented.

BMI, body mass index; CI, confidence interval; eGFR, estimated glomerular filtration rate; HDL-C, high-density lipoprotein cholesterol; HOMA-IR, homeostatic model assessment of insulin resistance; HR, hazard ratio; LDL-C, low-density lipoprotein cholesterol.

**Supplementary Table S3. Risk of adverse renal outcomes in patients without adverse renal outcomes during the exposure period (n=5,126).**

| HOMA-IR trajectory | Unadjusted HR<br>(95% CI) | P-<br>value | Model 1<br>HR (95% CI) | P-<br>value | Model 2<br>HR (95% CI) | P-<br>value | Model 3<br>HR (95% CI) | P-<br>value |
|--------------------|---------------------------|-------------|------------------------|-------------|------------------------|-------------|------------------------|-------------|
| Stable             | 1 (ref)                   | NA          | 1 (ref)                | NA          | 1 (ref)                | NA          | 1 (ref)                | NA          |
| Increasing         | 1.83 (1.39 – 2.40)        | <0.001      | 1.65 (1.26 – 2.17)     | <0.001      | 1.40 (1.04 – 1.88)     | 0.027       | 1.55 (1.13 – 2.12)     | 0.007       |

HR (95% CI) for adverse renal outcomes of increasing HOMA-IR trajectory compared to stable HOMA-IR trajectory is presented. In this population, adverse renal outcomes occurred in 372 patients during the event accrual period.

Model 1, adjusted for age, sex, baseline eGFR.

Model 2, Model 1 + BMI  $\geq 25\text{kg/m}^2$ , diabetes mellitus, hypertension, dyslipidemia

Model 3, Model 1 + baseline BMI, SBP, LDL-C, HOMA-IR, hs-CRP

BMI, body mass index; CI, confidence interval; eGFR, estimated glomerular filtration rate; HOMA-IR, homeostatic model assessment of insulin resistance; HR, hazard ratio; hs-CRP, high-sensitivity C-reactive protein; LDL-C, low-density lipoprotein cholesterol; SBP, systolic blood pressure.

**Supplementary Table S4. Risk of adverse renal outcomes in patients with eGFR  $\geq 90$  mL/min/1.73m<sup>2</sup> at baseline and fourth check-ups (n=704).**

| Adjusted variables              | HR (95% CI)         | P-value |
|---------------------------------|---------------------|---------|
| Age                             | 4.04 (1.42 – 11.51) | 0.009   |
| Sex                             | 3.82 (1.34 – 10.89) | 0.012   |
| Baseline eGFR                   | 3.97 (1.40 – 11.30) | 0.010   |
| BMI $\geq 25$ kg/m <sup>2</sup> | 3.84 (1.31 – 11.26) | 0.014   |
| Diabetes mellitus               | 3.73 (1.22 – 11.34) | 0.021   |
| Hypertension                    | 3.03 (1.03 – 8.96)  | 0.045   |
| Dyslipidemia                    | 3.13 (1.09 – 9.02)  | 0.035   |
| Baseline BMI                    | 3.30 (1.11 – 9.82)  | 0.032   |
| Baseline SBP                    | 3.22 (1.12 – 9.24)  | 0.030   |
| Baseline LDL-C                  | 3.87 (1.23 – 12.21) | 0.021   |
| Baseline HOMA-IR                | 3.83 (1.26 – 11.68) | 0.018   |
| Baseline hs-CRP                 | 3.92 (1.38 – 11.15) | 0.010   |

HR (95% CI) for adverse renal outcomes of the increasing HOMA-IR trajectory compared to the stable HOMA-IR trajectory is presented. Due to the small number of adverse renal outcomes (n=17) in this population, covariates were individually adjusted to avoid overfitting.

BMI, body mass index; CI, confidence interval; eGFR, estimated glomerular filtration rate; HOMA-IR, homeostatic model assessment of insulin resistance; HR, hazard ratio; hs-CRP, high-sensitivity C-reactive protein; LDL-C, low-density lipoprotein cholesterol; SBP, systolic blood pressure.

**Supplementary Table S5. Baseline characteristics by three HOMA-IR trajectories.**

|                                 | HOMA-IR trajectory                               |                                                 |                       | P-value |
|---------------------------------|--------------------------------------------------|-------------------------------------------------|-----------------------|---------|
|                                 | Stable with low<br>baseline HOMA-IR<br>(n=4,232) | Stable with high<br>baseline HOMA-IR<br>(n=752) | Increasing<br>(n=363) |         |
| Age, years                      | 51.0±8.2                                         | 51.2±8.0                                        | 51.8±8.4              | 0.071   |
| Male                            | 2004 (47.4)                                      | 357 (47.5)                                      | 196 (54.0)            | 0.051   |
| BMI, kg/m <sup>2</sup>          | 24.1±2.9                                         | 26.7±2.9                                        | 26.5±3.2              | <0.001  |
| Waist circumference, cm         | 81.1±8.2                                         | 88.5±7.6                                        | 87.6±8.1              | <0.001  |
| SBP, mmHg                       | 119.0±17.0                                       | 126.5±18.3                                      | 123.9±18.0            | <0.001  |
| DBP, mmHg                       | 79.1±10.9                                        | 83.8±11.2                                       | 82.8±11.5             | <0.001  |
| ALT, units/L                    | 25.6±20.3                                        | 34.4±20.8                                       | 45.2±89.2             | <0.001  |
| AST, units/L                    | 28.2±12.9                                        | 29.8±11.9                                       | 38.6±47.4             | <0.001  |
| BUN, mg/dl                      | 14.2±3.6                                         | 14.2±3.4                                        | 14.6±3.6              | 0.041   |
| Creatinine, mg/dl               | 0.83±0.16                                        | 0.83±0.17                                       | 0.84±0.17             | 0.099   |
| Cholesterol, mg/dl              | 188.3±33.8                                       | 197.5±34.7                                      | 200.4±37.7            | <0.001  |
| HDL-C, mg/dl                    | 45.4±10.0                                        | 41.0±8.0                                        | 41.8±9.2              | <0.001  |
| Fasting glucose, mg/dl          | 82.9±10.7                                        | 98.8±31.9                                       | 105.5±35.9            | <0.001  |
| HbA1c, %                        | 5.6±0.5                                          | 6.2±1.2                                         | 6.7±1.6               | <0.001  |
| eGFR, ml/min/1.73m <sup>2</sup> | 93.1±12.3                                        | 92.3±12.8                                       | 92.4±12.7             | 0.071   |
| HOMA-IR                         | 1.4±0.6                                          | 3.1±1.9                                         | 2.0±1.2               | <0.001  |
| hs-CRP                          | 0.2±0.6                                          | 0.2±0.3                                         | 0.3±0.6               | 0.003   |
| Diabetes mellitus               | 316 (7.5)                                        | 231 (30.7)                                      | 181 (49.9)            | <0.001  |
| Hypertension                    | 1097 (25.9)                                      | 329 (43.8)                                      | 154 (42.4)            | <0.001  |
| Dyslipidemia                    | 1845 (43.6)                                      | 507 (67.4)                                      | 240 (66.1)            | <0.001  |

All values are presented as number (percentage) or mean ± standard deviation.

ALT, alanine transaminase; AST, aspartate transaminase; BMI, body mass index; BUN, blood urea nitrogen; DBP, diastolic blood pressure; eGFR, glomerular filtration rate; HbA1c, glycated hemoglobin; HDL-C, high-density lipoprotein cholesterol; HOMA-IR, homeostatic model assessment of insulin resistance; hs-CRP, high-sensitivity C-reactive protein; SBP, systolic blood pressure.

**Supplementary Table S6. Baseline characteristics by four HOMA-IR trajectories.**

|                                 | HOMA-IR trajectory                               |                                                 |                                  |                               | P-value |
|---------------------------------|--------------------------------------------------|-------------------------------------------------|----------------------------------|-------------------------------|---------|
|                                 | Stable with low<br>baseline HOMA-IR<br>(n=3,200) | Stable with high<br>baseline HOMA-IR<br>(n=410) | Slightly increasing<br>(n=1,283) | Rapidly increasing<br>(n=454) |         |
| Age, years                      | 51.1±8.3                                         | 50.8±7.9                                        | 50.8±8.1                         | 51.9±8.4                      | 0.470   |
| Male                            | 1525 (47.7)                                      | 189 (46.1)                                      | 600 (46.8)                       | 243 (53.5)                    | 0.071   |
| BMI, kg/m <sup>2</sup>          | 23.7±2.8                                         | 26.9±3.0                                        | 25.6±2.7                         | 26.5±3.1                      | <0.001  |
| Waist circumference, cm         | 79.9±8.0                                         | 89.2±7.9                                        | 85.2±7.8                         | 87.7±8.0                      | <0.001  |
| SBP, mmHg                       | 118.0±16.8                                       | 126.1±18.1                                      | 122.8±17.7                       | 124.8±17.8                    | <0.001  |
| DBP, mmHg                       | 78.4±10.7                                        | 83.7±11.1                                       | 81.6±11.4                        | 83.1±11.1                     | <0.001  |
| ALT, units/L                    | 24.6±20.4                                        | 34.1±20.4                                       | 29.6±20.4                        | 43.1±80.4                     | <0.001  |
| AST, units/L                    | 28.1±13.4                                        | 29.6±12.3                                       | 28.7±11.0                        | 37.0±42.8                     | <0.001  |
| BUN, mg/dl                      | 14.2±3.6                                         | 14.2±3.5                                        | 14.2±3.5                         | 14.6±3.6                      | 0.063   |
| Creatinine, mg/dl               | 0.82±0.16                                        | 0.83±0.18                                       | 0.84±0.17                        | 0.84±0.17                     | 0.001   |
| Cholesterol, mg/dl              | 187.0±33.6                                       | 195.2±35.2                                      | 193.8±34.0                       | 201.4±37.6                    | <0.001  |
| HDL-C, mg/dl                    | 46.2±10.2                                        | 41.2±8.7                                        | 42.6±8.9                         | 41.6±8.7                      | <0.001  |
| Fasting glucose, mg/dl          | 81.9±9.9                                         | 104.0±36.8                                      | 86.6±12.3                        | 104.9±36.2                    | <0.001  |
| HbA1c, %                        | 5.5±0.5                                          | 6.3±1.3                                         | 5.7±0.6                          | 6.7±1.6                       | <0.001  |
| eGFR, ml/min/1.73m <sup>2</sup> | 93.4±12.2                                        | 93.3±12.7                                       | 91.9±12.6                        | 92.4±12.6                     | 0.001   |
| HOMA-IR                         | 1.2±0.5                                          | 3.7±2.2                                         | 1.8±0.6                          | 2.1±1.2                       | <0.001  |
| hs-CRP                          | 0.2±0.4                                          | 0.2±0.3                                         | 0.3±0.9                          | 0.3±0.5                       | <0.001  |
| Diabetes mellitus               | 205 (6.4)                                        | 133 (32.4)                                      | 172 (13.4)                       | 218 (48.0)                    | <0.001  |
| Hypertension                    | 745 (23.3)                                       | 175 (42.7)                                      | 462 (36.0)                       | 198 (43.6)                    | <0.001  |
| Dyslipidemia                    | 1269 (39.7)                                      | 268 (65.4)                                      | 751 (58.5)                       | 304 (67.0)                    | <0.001  |

All values are presented as number (percentage) or mean ± standard deviation.

ALT, alanine transaminase; AST, aspartate transaminase; BMI, body mass index; BUN, blood urea nitrogen; DBP, diastolic blood pressure; eGFR, glomerular filtration rate; HbA1c, glycated hemoglobin; HDL-C, high-density lipoprotein cholesterol; HOMA-IR, homeostatic model assessment of insulin resistance; hs-CRP, high-sensitivity C-reactive protein; SBP, systolic blood pressure.

**Supplementary Table S7. Annual rate of eGFR decline during the event accrual period according to the HOMA-IR trajectories.**

| HOMA-IR trajectory | Slopes of eGFR decline, ml/min/1.73m <sup>2</sup> per year | P-value |
|--------------------|------------------------------------------------------------|---------|
| Increasing         | -1.64 ± 1.82                                               | 0.008   |
| Stable             | -1.43 ± 1.61                                               |         |

eGFR, glomerular filtration rate; HOMA-IR, homeostatic model assessment of insulin resistance.

**Supplementary Table S8. Baseline characteristics according to the HOMA-IR trajectories in subjects with and without prevalent diabetes mellitus at baseline.**

|                                 | Subjects without diabetes mellitus at baseline |                       |         | Subjects with diabetes mellitus at baseline |                       |         | Subjects with diabetes mellitus at the end of the exposure period (4 <sup>th</sup> check-up) |                       |         |
|---------------------------------|------------------------------------------------|-----------------------|---------|---------------------------------------------|-----------------------|---------|----------------------------------------------------------------------------------------------|-----------------------|---------|
|                                 | Stable<br>(n=4,318)                            | Increasing<br>(n=301) | P-value | Stable<br>(n=452)                           | Increasing<br>(n=276) | P-value | Stable<br>(n=735)                                                                            | Increasing<br>(n=386) | P-value |
| Age, years                      | 50.6±8.1                                       | 50.8±8.2              | 0.709   | 54.4±8.4                                    | 52.6±8.1              | 0.004   | 52.9±8.3                                                                                     | 52.0±8.0              | 0.085   |
| Male                            | 2019 (46.8)                                    | 154 (51.2)            | 0.155   | 240 (53.1)                                  | 144 (52.2)            | 0.868   | 400 (54.4)                                                                                   | 203 (52.6)            | 0.602   |
| BMI, kg/m <sup>2</sup>          | 24.3±2.9                                       | 26.7±3.1              | <0.001  | 25.1±3.1                                    | 26.6±3.2              | <0.001  | 25.1±2.9                                                                                     | 26.7±3.1              | <0.001  |
| Waist circumference, cm         | 81.5±8.4                                       | 88.1±8.4              | <0.001  | 85.6±8.1                                    | 88.3±7.6              | <0.001  | 84.7±8.1                                                                                     | 88.4±7.8              | <0.001  |
| SBP, mmHg                       | 119.0±17.1                                     | 124.7±17.0            | <0.001  | 126.1±18.2                                  | 126.9±18.7            | 0.612   | 124.5±18.2                                                                                   | 126.1±18.1            | 0.171   |
| DBP, mmHg                       | 79.3±11.0                                      | 84.0±10.7             | <0.001  | 82.1±11.2                                   | 83.2±11.6             | 0.188   | 81.7±11.0                                                                                    | 83.4±11.3             | 0.014   |
| ALT, units/L                    | 25.8±20.0                                      | 40.0±45.9             | <0.001  | 32.4±23.1                                   | 44.7±92.8             | 0.032   | 31.0±17.4                                                                                    | 44.0±83.3             | 0.003   |
| AST, units/L                    | 28.0±12.3                                      | 35.0±29.3             | <0.001  | 30.9±15.6                                   | 37.3±46.7             | 0.029   | 29.7±11.2                                                                                    | 36.7±41.9             | 0.001   |
| BUN, mg/dl                      | 14.1±3.5                                       | 14.5±3.5              | 0.083   | 14.5±3.7                                    | 14.7±3.5              | 0.459   | 14.3±3.6                                                                                     | 14.7±3.5              | 0.082   |
| Creatinine, mg/dl               | 0.83±0.16                                      | 0.83±0.17             | 0.398   | 0.83±0.17                                   | 0.85±0.17             | 0.187   | 0.84±0.17                                                                                    | 0.84±0.17             | 0.842   |
| Cholesterol, mg/dl              | 188.2±33.3                                     | 196.9±33.9            | <0.001  | 198.3±37.9                                  | 205.8±40.3            | 0.012   | 196.1±34.0                                                                                   | 204.0±38.1            | 0.001   |
| HDL-C, mg/dl                    | 45.1±9.9                                       | 40.9±8.6              | <0.001  | 43.5±10.0                                   | 41.5±8.8              | 0.178   | 43.1±8.9                                                                                     | 41.0±8.5              | <0.001  |
| Fasting glucose, mg/dl          | 82.3±8.2                                       | 86.9±9.5              | <0.001  | 104.5±31.9                                  | 133.0±45.6            | <0.001  | 96.9±26.1                                                                                    | 118.9±42.8            | <0.001  |
| HbA1c, %                        | 5.5±0.3                                        | 5.7±0.4               | <0.001  | 6.6±1.3                                     | 7.7±1.7               | <0.001  | 6.2±1.1                                                                                      | 7.2±1.6               | <0.001  |
| eGFR, ml/min/1.73m <sup>2</sup> | 93.2±12.3                                      | 93.5±12.6             | 0.706   | 91.3±12.9                                   | 90.8±12.9             | 0.625   | 91.2±12.9                                                                                    | 91.9±12.8             | 0.425   |
| HOMA-IR                         | 1.5±0.9                                        | 2.2±1.5               | <0.001  | 1.9±1.2                                     | 3.2±2.1               | <0.001  | 1.7±1.0                                                                                      | 2.9±2.0               | <0.001  |
| hs-CRP                          | 0.2±0.6                                        | 0.3±0.5               | 0.077   | 0.3±0.5                                     | 0.3±0.3               | 0.890   | 0.2±0.4                                                                                      | 0.3±0.3               | 0.384   |
| Hypertension                    | 1117 (25.9)                                    | 126 (41.9)            | <0.001  | 204 (45.1)                                  | 133 (48.2)            | 0.468   | 277 (37.7)                                                                                   | 179 (46.4)            | 0.006   |
| Dyslipidemia                    | 1916 (44.4)                                    | 200 (66.4)            | <0.001  | 282 (62.4)                                  | 194 (70.3)            | 0.036   | 435 (59.2)                                                                                   | 274 (71.0)            | <0.001  |

All values are presented as number (percentage) or mean ± standard deviation.

ALT, alanine transaminase; AST, aspartate transaminase; BMI, body mass index; BUN, blood urea nitrogen; DBP, diastolic blood pressure; eGFR, glomerular filtration rate; HbA1c, glycated hemoglobin; HDL-C, high-density lipoprotein cholesterol; HOMA-IR, homeostatic model assessment of insulin resistance; hs-CRP, high-sensitivity C-reactive protein; SBP, systolic blood pressure.

## **Supplementary Figure Legends**

### **Supplementary Figure S1. Time-serial trend in the change of HOMA-IR during the exposure period according to each HOMA-IR trajectory group.**

Distinct HOMA-IR trajectory groups were defined with latent variable mixture modeling using the HOMA-IR information at each follow-up during the exposure period. (A) Mean HOMA-IR at each biennial check-up in the entire cohort and in each HOMA-IR trajectory group. (B) Changes in HOMA-IR from baseline at each biennial check-up in the entire cohort and in each HOMA-IR trajectory group.

HOMA-IR, homeostatic model assessment of insulin resistance.

### **Supplementary Figure S2. Cumulative incidence of adverse renal outcomes in patients without adverse renal outcomes during the exposure period (n=5,126) or with normal renal function (n=704).**

(A) The cumulative incidence of adverse renal outcomes in 5,126 patients who did not develop adverse renal outcomes during the exposure period. (B) The cumulative incidence of adverse renal outcomes in 704 patients with  $\text{eGFR} \geq 90 \text{ mL/min/1.73m}^2$  at baseline and fourth check-ups.

CI, confidence interval; eGFR, estimated glomerular filtration rate; HOMA-IR, homeostatic model assessment of insulin resistance; HR, hazard ratio.

### **Supplementary Figure S3. Time-serial trend in the change of HOMA-IR during the exposure period and cumulative incidence of adverse renal outcomes according to three HOMA-IR trajectory groups.**

Distinct HOMA-IR trajectory groups were defined with latent variable mixture modeling using the HOMA-IR information at each follow-up during the exposure period. However,

three HOMA-IR trajectory groups were used for a sensitivity analysis. (A) Mean HOMA-IR at each biennial check-up in the entire cohort and in the three HOMA-IR trajectory groups. (B) Changes in HOMA-IR from baseline at each biennial check-up in the entire cohort and in the three HOMA-IR trajectory groups. (C) The cumulative incidence of adverse renal outcomes in the stable with low HOMA-IR, stable with high HOMA-IR, and increasing HOMA-IR trajectory group is presented.

CI, confidence interval; HOMA-IR, homeostatic model assessment of insulin resistance; HR, hazard ratio.

**Supplementary Figure S4. Time-serial trend in the change of HOMA-IR during the exposure period and cumulative incidence of adverse renal outcomes according to four HOMA-IR trajectory groups.**

Four HOMA-IR trajectory groups were used for a sensitivity analysis. (A) Mean HOMA-IR at each biennial check-up in the entire cohort and in the four HOMA-IR trajectory groups. (B) Changes in HOMA-IR from baseline at each biennial check-up in the entire cohort and in the four HOMA-IR trajectory groups. (C) The cumulative incidence of adverse renal outcomes in the stable with low HOMA-IR, stable with high HOMA-IR, slightly increasing, and rapidly increasing HOMA-IR trajectory group is presented.

CI, confidence interval; HOMA-IR, homeostatic model assessment of insulin resistance; HR, hazard ratio.

**Supplementary Figure S5. Cumulative incidence of different definitions of renal outcomes according to HOMA-IR trajectory groups.**

The cumulative incidence of (A) both decreased eGFR and proteinuria and (B) eGFR <45 mL/min/1.73m<sup>2</sup> in at least 2 consecutive check-ups or albumin $\geq$ 3+ on urine strip in the stable and increasing HOMA-IR trajectory group is presented.

CI, confidence interval; eGFR, estimated glomerular filtration rate; HOMA-IR, homeostatic model assessment of insulin resistance; HR, hazard ratio.

**Supplementary Figure S6. Longitudinal HOMA-IR patterns and renal outcomes according to each HOMA-IR trajectory group in subjects with and without diabetes mellitus at baseline.**

(A) HOMA-IR pattern during the exposure period and (B) the cumulative incidence of adverse renal outcomes in the stable and increasing HOMA-IR trajectory groups are presented in subjects without diabetes mellitus at baseline. (C) HOMA-IR pattern during the exposure period and (D) the cumulative incidence of adverse renal outcomes in the stable and increasing HOMA-IR trajectory groups are presented in subjects with diabetes mellitus at baseline.

CI, confidence interval; HOMA-IR, homeostatic model assessment of insulin resistance; HR, hazard ratio.

**Supplementary Figure S7. Longitudinal HOMA-IR patterns and renal outcomes according to each HOMA-IR trajectory group in subjects with diabetes mellitus at the end of the exposure period (4<sup>th</sup> check-up).**

(A) HOMA-IR pattern during the exposure period and (B) the cumulative incidence of adverse renal outcomes in the stable and increasing HOMA-IR trajectory groups are presented in subjects with diabetes mellitus at the end of the exposure period (4<sup>th</sup> check-up).

CI, confidence interval; HOMA-IR, homeostatic model assessment of insulin resistance; HR, hazard ratio.

**Supplementary Figure S8. Risk of adverse renal outcomes in relation to baseline covariates.**

Comparison of the risk of adverse renal outcomes between the subgroups of the stable and increasing HOMA-IR trajectory groups by various covariates or comorbidities at baseline, and baseline HOMA-IR value or eGFR are presented. The 75<sup>th</sup> percentile value of HOMA-IR was used to divide the whole population into subgroups based on HOMA-IR.

CI, confidence interval; eGFR, estimated glomerular filtration rate; HOMA-IR, homeostatic model assessment of insulin resistance; HR, hazard ratio.

**Supplementary Figure S9. Longitudinal HOMA-IR patterns and adverse renal outcomes in 1:1 matched stable and increasing HOMA-IR trajectory group participants by baseline HOMA-IR.**

In 1:1 matched pairs by baseline HOMA-IR, (A) HOMA-IR pattern during the exposure period and (B) the cumulative incidence of adverse renal outcomes in the stable and increasing HOMA-IR trajectory groups are presented.

CI, confidence interval; HOMA-IR, homeostatic model assessment of insulin resistance; HR, hazard ratio.

### **Supplementary References**

1. Joo YS, Lee C, Kim HW, Jhee J, Yun HR, Park JT, Chang TI, Yoo TH, Kang SW, Han SH. Association of Longitudinal Trajectories of Systolic BP with Risk of Incident CKD: Results from the Korean Genome and Epidemiology Study. J Am Soc Nephrol 2020;31:2133-2144
